# Supplementary material for: Template controlled synthesis of a coordinated [11]ane-P2CNHC macrocycle
Source: Royal Society of Chemistry journal article supplement (doi:10.1039/b617033a), 2007-01-01
Supplement: b617033a.pdf [file b617033a.pdf]

## Template controlled synthesis of a coordinated [11]ane-P<sub>2</sub>C<sup>NHC</sup> macrocycle

Oliver Kaufhold, Andreas Stasch, Peter G. Edwards, und F. Ekkehardt Hahn

**General:** All preparations were carried out under an argon atmosphere using conventional Schlenk techniques. Solvents were dried and degassed by standard methods prior to use. The preparation of 1,2-bis(phosphino)benzene,<sup>1</sup> 1,2-bis(dichlorophosphino)benzene **2**,<sup>2</sup> and ( $\beta$ -triphenylphosphinimine)ethylenamine **4**<sup>3</sup> have been described. *o*-bromofluorobenzene was degassed and dried over a molecular sieve. All other chemicals were used as received. NMR spectra were recorded with a Bruker Avance I 400 NMR spectrometer. IR spectra were measured with a Bruker Vector 22 spectrometer. Electrospray mass spectra were obtained with a Daltronics Micro TOF spectrometer.

**Synthesis of 2:** Compound **2** was prepared using a modified protocol of the synthesis reported by Kyba.<sup>1</sup> A solution of triphosgene (15.0 g, 50.5 mmol) in CH<sub>2</sub>Cl<sub>2</sub> (150 mL) was treated dropwise with a solution of 1,2-bis(phosphino)benzene (3.2 g, 22.5 mmol) in CH<sub>2</sub>Cl<sub>2</sub> (50 mL) at -78 °C. The reaction mixture was allowed to warm up to ambient temperature and was stirred at this temperature for 3 d. Compound **2** was obtained as colorless liquid after distillation in vacuo. Yield: 2.8 g (10.0 mmol, 44 %). The <sup>1</sup>H NMR data match those reported.<sup>1</sup> <sup>13</sup>C{<sup>1</sup>H} NMR (100.6 MHz, CDCl<sub>3</sub>):  $\delta$  144.6 (d, <sup>1</sup>J<sub>PC</sub> = 13 Hz, Ar-C<sub>ipso</sub>), 133.8 (Ar-C<sub>meta</sub>), 131.1 (d, <sup>2</sup>J<sub>PC</sub> = 9 Hz, Ar-C<sub>ortho</sub>); <sup>31</sup>P{<sup>1</sup>H} NMR (162.0 MHz, CDCl<sub>3</sub>):  $\delta$  151.

**Synthesis of 3:** The reaction has to be carried out at -78 °C. The reactants have to be cooled to this temperature prior to use. A solution of *n*-butyllithium (22.1 mL of a 2.5 M solution, 55.3 mmol) in diethyl ether (100 mL) was treated dropwise with a solution of *o*-bromofluorobenzene (6.3 mL, 57.8 mmol) in diethyl ether (20 mL). After 15 min, a solution of **2** (3.8 g, 12.8 mmol) in diethyl ether (20 mL) was added to the reaction mixture. The

resulting mixture was stirred for 4 h at  $-78\text{ C}$  and then for 12 h at ambient temperature. Aqueous ammonium chloride (150 mL) was added and the mixture was extracted with diethyl ether ( $4 \times 250\text{ mL}$ ). The solvent of the combined organic phase was removed in vacuo and the residue was dissolved in hot methanol. Compound **3** was isolated by filtration after cooling to  $-35\text{ }^{\circ}\text{C}$ . The crude product was again dissolved in dichloromethane (10 mL) and purified by passing down a short (2 cm)  $\text{SiO}_2$  column. After removal of the solvent compound **3** was isolated as a colourless solid. Yield: 3.2 g (6.2 mmol, 48 %).  $^1\text{H}$  NMR (400.1 MHz,  $\text{CDCl}_3$ , assignment of signals see Scheme 2):  $\delta$  7.33 (m, 2H, Ar-H3), 7.31 (m, 4H, Ar-H7), 7.14 (m, 2H, Ar-H2), 7.04 (m, 4H, Ar-H6), 7.00 (m, 4H, Ar-H8), 6.92 (m, 4H, Ar-H5);  $^{13}\text{C}\{^1\text{H}\}$  NMR (100.6 MHz,  $\text{CDCl}_3$ , assignment of signals see Scheme 2):  $\delta$  164.1 (d,  $^1J_{\text{CF}} = 264\text{ Hz}$ , Ar-C9), 140.7 (m, Ar-C1), 134.7 (m, Ar-C5), 133.9 (m, Ar-C2), 131.1 (d,  $^3J_{\text{CF}} = 8.3\text{ Hz}$ , Ar-C7), 129.9 (Ar-C3), 124.4 (d,  $^3J_{\text{CP}} = 2.7\text{ Hz}$ , Ar-C6), 122.7 (m, Ar-C4), 115.2 (d,  $^2J_{\text{CF}} = 23.2\text{ Hz}$ , Ar-C8);  $^{31}\text{P}\{^1\text{H}\}$  NMR (162.0 MHz,  $\text{CDCl}_3$ ):  $\delta$   $-36$  (m).  $^{19}\text{F}$  NMR (376.5 MHz,  $\text{CDCl}_3$ ):  $\delta$   $-103$  (m); ES-MS (positive ions):  $m/z$  (%): 541.0872 (100) (calcd.  $[\text{C}_{30}\text{H}_{20}\text{F}_4\text{P}_2 + \text{Na}]^+$  541.0869), 519.1062 (18) (calcd.  $[\text{C}_{30}\text{H}_{20}\text{F}_4\text{P}_2 + \text{H}]^+$  519.1055).

**Synthesis of [1]:** Complex [1] was prepared as described for  $[\text{ReBr}(\text{CO})_4(\text{NHC})]^{[3]}$  as a colourless solid. Yield: 83 %.  $^1\text{H}$  NMR (400.1 MHz,  $\text{CDCl}_3$ ):  $\delta$  6.90 (s, br, 2H, NH), 3.72 (s, 4H,  $\text{NCH}_2\text{CH}_2\text{N}$ );  $^{13}\text{C}\{^1\text{H}\}$  NMR (100.6 MHz,  $\text{CDCl}_3$ ):  $\delta$  193.6 (NCN), 186.8 (CO), 184.9 (CO), 184.7 (CO), 44.2 ( $\text{NCH}_2\text{CH}_2\text{N}$ ); IR (KBr):  $\nu$  3429 (s, NH), 3265 (s, br, NH), 2107 (s, CO), 2016 (s, CO), 1993 (s, br, CO), 1924 (s, br, CO); ES-MS (positive ions):  $m/z$  (%): 426.9455 (100) (calcd.  $[\text{C}_7\text{H}_6\text{N}_2\text{ClO}_4\text{Re} + \text{Na}]^+$  426.9457).

**Synthesis of [4]Cl:** A solution of complex [1] (150 mg, 0.37 mmol) and ligand **3** (250 mg, 0.48 mmol) in acetonitrile (5 mL) was heated under reflux for 6 h. After cooling to ambient temperature the solution was concentrated and diethyl ether (20 mL) was added. Complex [4]Cl precipitated and was isolated by filtration. Yield: 330 mg (0.36 mmol, 98 %).  $^1\text{H}$  NMR (400.1 MHz,  $\text{CD}_3\text{CN}$ , assignment of signals see Scheme 2):  $\delta$  8.02 (m, 2H, Ar-H4), 7.88 (m, 2H, Ar-H5), 7.67 (m, 2H, Ar-H9), 7.44 (m, 2H, Ar-H15), 7.39 (m, 2H, Ar-H10), 7.32 (m, 2H, Ar-H11), 7.27 (m, 2H, Ar-H8), 7.16 (m, 2H, Ar-H16), 7.10 (m, 2H, Ar-H14), 6.92 (m, 2H, Ar-H17), 6.56 (s, 2H, NH), 3.21 (s, 4H,  $\text{NCH}_2\text{CH}_2\text{N}$ );  $^{13}\text{C}\{^1\text{H}\}$  NMR (100.6 MHz,  $\text{CD}_3\text{CN}$ , assignment of signals see Scheme 2):  $\delta$  191.0 (dd,  $^2J_{\text{CP-trans}} = 50.4\text{ Hz}$ ,  $^2J_{\text{CP-cis}} = 8.2\text{ Hz}$ ,  $\text{CO}_{\text{cis-c1}}$ ), 190.0 (m, br,  $\text{CO}_{\text{trans-c1}}$ ), 189.8 (t,  $^2J_{\text{CP}} = 9.8\text{ Hz}$ , C1), 164.5 (d,  $^1J_{\text{CF}} = 249\text{ Hz}$ , C7), 163.4

(dd,  $^1J_{CF} = 247$  Hz,  $^2J_{CP} = 4.9$  Hz, C13), 139.2 (dd,  $^1J_{CP} = 48.5$  Hz,  $^2J_{CP} = 33.4$  Hz, C3), 136.8 (dd,  $^2J_{CP} = 14.0$  Hz,  $^3J_{CP} = 2.5$  Hz, C4), 136.8 (m, C11), 136.6 (dd,  $^3J_{CF} = 9.5$  Hz,  $^4J_{CP} = 2.0$  Hz, C9), 134.9 (dd,  $^3J_{CF} = 8.5$  Hz,  $^4J_{CP} = 1.6$  Hz, C15), 134.8 (dd,  $^3J_{CP} = 6.2$  Hz,  $^4J_{CP} = 2.2$  Hz, C5), 133.0 (m, C17), 126.5 (dd,  $^3J_{CP} = 11.2$  Hz,  $^4J_{CF} = 3.0$  Hz, C10), 125.6 (dd,  $^3J_{CP} = 8.3$  Hz,  $^4J_{CF} = 3.0$  Hz, C16), 122.2 (ddd,  $^1J_{CP} = 53$  Hz,  $^2J_{CF} = 17$  Hz,  $^4J_{CP} = 2.0$  Hz, C12), 118.2 (dd,  $^2J_{CF} = 23.8$  Hz,  $^3J_{CP} = 3.4$  Hz, C8), 117.3 (ddd,  $^1J_{CP} = 45$  Hz,  $^2J_{CF} = 16.4$  Hz,  $^4J_{CP} = 2.8$  Hz, C6), 117.0 (dd,  $^2J_{CF} = 23.0$  Hz,  $^3J_{CP} = 3.7$  Hz, C14), 45.9 (C2);  $^{31}\text{P}\{\text{H}\}$  NMR (162.0 MHz,  $\text{CDCl}_3$ ):  $\delta$  22 (d);  $^{19}\text{F}$  NMR (376.5 MHz,  $\text{CD}_3\text{CN}$ ):  $\delta$  -98, -100; IR (KBr):  $\nu$  3460 (w, NH), 2043 (s, CO), 1971 (s, CO), 1949 (s, CO); ES-MS (positive ions):  $m/z$  (%): 859.0893 (100) (calcd.  $[\text{C}_{36}\text{H}_{26}\text{N}_2\text{F}_4\text{O}_3\text{P}_2\text{Re}]^+$  859.0909).

**Synthesis of [5]Cl:** A suspension of [4]Cl (280 mg, 0.31 mmol) in THF (5 mL) was treated dropwise with a solution of  $\text{KO}t\text{-Bu}$  (12.5 mL of a 0.05 M solution, 0.62 mmol). A clear solution was obtained after the addition. This solution was stirred at ambient temperature for 5 d. The solid formed during this time was isolated by filtration and dissolved in dichloromethane. Remaining solids were separated by filtration. Complex [5]Cl was obtained as a pale yellow solid after removal of the solvent. Yield: 240 mg (0.28 mmol, 91 %).  $^1\text{H}$  NMR (400.1 MHz,  $\text{CD}_3\text{CN}$ , assignment of the signals see Scheme 2):  $\delta$  7.83 (m, 2H, Ar-H5), 7.81 (m, 2H, Ar-H4), 7.69 (m, 2H, Ar-H13), 7.66 (m, 2H, Ar-H9), 7.63 (m, 2H, Ar-H16), 7.39 (m, 2H, Ar-H14), 7.38 (m, 2H, Ar-H15), 7.37 (m, 2H, Ar-H8), 7.25 (t, 2H, Ar-H10), 6.97 (m, 2H, Ar-H11), 4.61 (m, 2H, N-C(2)H-C(2)H-N), 3.15 (m, 2H, N-C(2)H-C(2)H-N);  $^{13}\text{C}\{\text{H}\}$  NMR (100.6 MHz,  $\text{CD}_3\text{CN}$ , assignment of the signals see Scheme 2):  $\delta$  193.4 (br,  $\text{CO}_{\text{trans-C1}}$ ), 192.3 (t,  $^2J_{CP} = 13.8$  Hz, C1), 191.1 (dm,  $^2J_{CP\text{-trans}} = 46.0$ ,  $\text{CO}_{\text{cis-C1}}$ ), 164.4 (dd,  $^1J_{CF} = 249$  Hz,  $^2J_{CP} = 5.0$  Hz, C7), 145.8 (d,  $^2J_{CP} = 11.8$  Hz, Ar-C17), 139.9 (m, Ar-C3), 136.6 (d,  $^3J_{CF} = 9.2$  Hz, Ar-C9), 136.2 (m, Ar-C4), 134.7 (d,  $^2J_{CP} = 1.6$  Hz, Ar-C13), 134.6 (m, Ar-C5), 134.3 (m, Ar-C11) 131.2 (d,  $^4J_{CP} = 1.6$  Hz, Ar-C15), 127.4 (d,  $^3J_{CP} = 8.3$  Hz, Ar-C14), 126.8 (m, Ar-C10), 125.6 (d,  $^3J_{CP} = 6.3$  Hz, Ar-C16), 123.8 (dd,  $^1J_{CP} = 56.4$  Hz,  $^4J_{CF} = 4.9$  Hz, Ar-C12), 117.8 (dd,  $^2J_{CF} = 21.9$  Hz,  $^3J_{CP} = 4.2$  Hz, Ar-C8), 115.1 (dd,  $^1J_{CP} = 54.6$  Hz,  $^2J_{CF} = 17.7$  Hz, Ar-C6), 52.4 (NCH<sub>2</sub>CH<sub>2</sub>N);  $^{31}\text{P}\{\text{H}\}$  NMR (162.0 MHz,  $\text{CD}_3\text{CN}$ ):  $\delta$  16 (d);  $^{19}\text{F}$  NMR (376.5 MHz,  $\text{CD}_3\text{CN}$ ):  $\delta$  -97 (m); IR (KBr):  $\nu$  2031 (s, CO), 1963 (s, CO), 1937 (s, CO). ES-MS (positive ions):  $m/z$  (%): 819.0770 (100) (calcd.  $[\text{C}_{36}\text{H}_{24}\text{N}_2\text{F}_2\text{O}_3\text{P}_2\text{Re}]^+$  819.0784).

**X-ray structure determinations.** [1]:  $C_7H_6N_2ClO_4Re$ ,  $M = 403.79$ , colourless crystal,  $0.20 \times 0.15 \times 0.08$  mm,  $a = 8.852(2)$ ,  $b = 10.297(2)$ ,  $c = 12.389(3)$  Å,  $\beta = 107.84(3)^\circ$ ,  $V = 1075.0(4)$  Å<sup>3</sup>,  $\rho_{\text{calc}} = 2.495$  g·cm<sup>-3</sup>,  $\mu = 11.547$  mm<sup>-1</sup>,  $\omega$ - and  $\phi$ -scans, 3540 measured intensities ( $6.4^\circ \leq 2\theta \leq 54.0^\circ$ ),  $\lambda = 0.71073$  Å,  $T = 150(2)$  K, semiempirical absorption correction ( $0.245 \leq T \leq 0.411$ ), 2315 observed ( $R_{\text{int}} = 0.0249$ ) and 2070 observed ( $I \geq 2\sigma(I)$ ) intensities,  $P2_1/c$ ,  $Z = 4$ ,  $R = 0.0264$ ,  $wR = 0.0596$ , refinement of 136 parameters against  $|F^2|$  with hydrogen atoms on calculated positions.

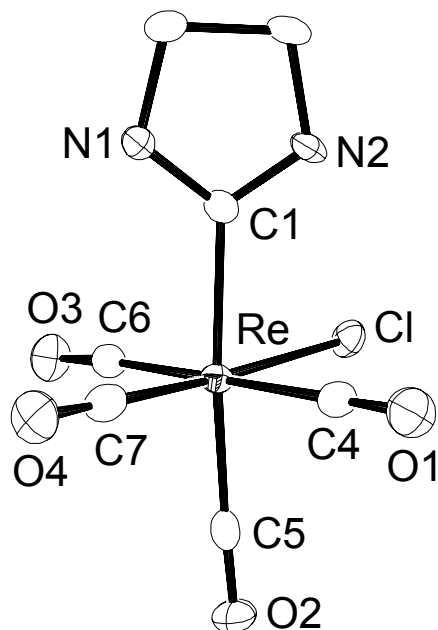

**Figure S1.** Molecular structure of complex [1]. Selected bond lengths [Å] and bond angles [°]: Re–Cl 2.4960(14), Re–C1 2.175(5), Re–C4 1.995(5), Re–C5 1.978(6), Re–C6 2.011(5), Re–C7 1.915(5), N1–C1 1.321(6), N2–C1 1.314(6); Cl–Re–C1 84.42(13), Cl–Re–C4 88.1(2), Cl–Re–C5 91.1(2), Cl–Re–C6 90.27(2), Cl–Re–C7 176.5(2), C1–Re–C4 88.7(2), C1–Re–C5 175.0(2), C1–Re–C6 92.2(2), C1–Re–C7 92.1(2), Re–C1–N1 126.5(4), Re–C1–N2 125.2(4), N1–C1–N2 108.2(4).

**3:**  $C_{30}H_{20}F_4P_2$ ,  $M = 518.40$ , colourless crystal,  $0.25 \times 0.20 \times 0.15$  mm,  $a = 10.966(2)$ ,  $b = 14.272(3)$ ,  $c = 15.942(3)$  Å,  $\beta = 91.88(3)$ ,  $V = 2493.8(9)$  Å<sup>3</sup>,  $\rho_{\text{calc}} = 1.381$  g·cm<sup>-3</sup>,  $\mu = 0.222$  mm<sup>-1</sup>,  $\omega$ - and  $\phi$ -scans, 8965 measured intensities ( $5.9^\circ \leq 2\theta \leq 51.0^\circ$ ),  $\lambda = 0.71073$  Å,  $T = 150(2)$  K, semiempirical absorption correction ( $0.802 \leq T \leq 0.989$ ), 4630 independent ( $R_{\text{int}} = 0.0419$ ) and 3481 observed ( $I \geq 2\sigma(I)$ ) intensities,  $P2_1/n$ ,  $Z = 4$ ,  $R = 0.0457$ ,  $wR = 0.0950$ , refinement of 325 parameters against  $|F^2|$  with hydrogen atoms on calculated positions.

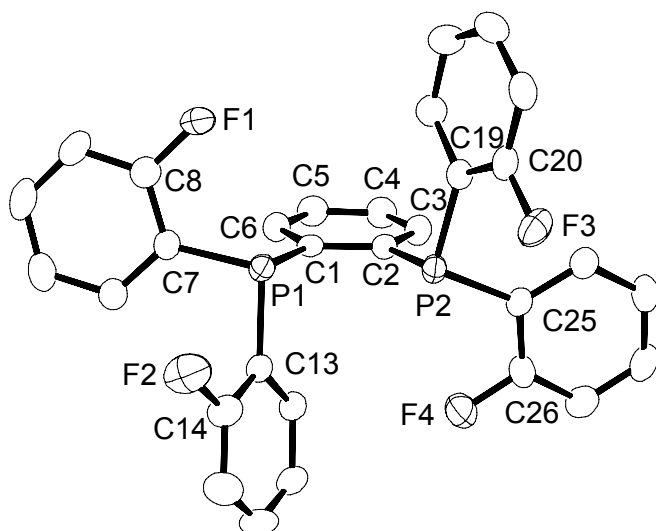

**Figure S2.** Molecular structure of compound **3**. Selected bond lengths [ $\text{\AA}$ ] and bond angles [ $^\circ$ ]: P1–C1 1.843(2), P1–C7 1.843(2), P1–C13 1.835(2), P2–C2 1.844(2), P2–C19 1.837(2), P2–C25 1.834(2), F1–C8 1.364(3), F2–C14 1.372(3), F3–C20 1.367(3), F4–C26 1.362(3); C1–P1–C7 103.48(10), C1–P1–C13 101.05(10), C7–P1–C13 101.07(10), C2–P2–C19 99.80(11), C2–P2–C25 101.71(10), C19–P2–C25 102.11(10).

[**4**]Cl $\cdot$ 3THF: C<sub>48</sub>H<sub>50</sub>N<sub>2</sub>ClF<sub>4</sub>O<sub>6</sub>P<sub>2</sub>Re,  $M = 1110.49$ , colourless crystal,  $0.50 \times 0.30 \times 0.30$  mm,  $a = 11.201(5)$ ,  $b = 11.800(5)$ ,  $c = 20.504(5)$   $\text{\AA}$ ,  $\alpha = 92.239(5)$ ,  $\beta = 100.058(5)$ ,  $\gamma = 117.123(5)^\circ$ ,  $V = 2353.1(2)$   $\text{\AA}^3$ ,  $\rho_{\text{calc}} = 1.567$  g $\cdot$ cm<sup>-3</sup>,  $\mu = 2.773$  mm<sup>-1</sup>,  $\omega$ - and  $\phi$ -scans, 16653 measured intensities ( $6.0^\circ \leq 2\theta \leq 52.0^\circ$ ),  $\lambda = 0.71073$   $\text{\AA}$ ,  $T = 150(2)$  K, semiempirical absorption correction ( $0.318 \leq T \leq 0.447$ ), 9183 independent ( $R_{\text{int}} = 0.0308$ ) and 8654 observed intensities ( $I \geq 2\sigma(I)$ ),  $P\bar{1}$ ,  $Z = 2$ ,  $R = 0.0399$ ,  $wR = 0.0929$ , refinement of 557 parameters against  $|F^2|$  with hydrogen atoms on calculated positions. The asymmetric unit contains one molecule of the complex and three molecules of THF. Two THF molecules are disordered.

[**5**]Cl $\cdot$ 3H<sub>2</sub>O: C<sub>36</sub>H<sub>30</sub>N<sub>2</sub>ClF<sub>2</sub>O<sub>6</sub>P<sub>2</sub>Re,  $M = 908.21$ , light yellow crystal,  $0.30 \times 0.20 \times 0.10$  mm,  $a = 9.030(5)$ ,  $b = 10.898(5)$ ,  $c = 19.929(5)$   $\text{\AA}$ ,  $\alpha = 75.388(5)$ ,  $\beta = 82.356(5)$ ,  $\gamma = 68.013(5)^\circ$ ,  $V = 1758.1(13)$   $\text{\AA}^3$ ,  $\rho_{\text{calc}} = 1.716$  g $\cdot$ cm<sup>-3</sup>,  $\mu = 3.682$  mm<sup>-1</sup>,  $\omega$ - and  $\phi$ -scans, 11370 measured intensities ( $6.3^\circ \leq 2\theta \leq 54^\circ$ ),  $\lambda = 0.71073$   $\text{\AA}$ ,  $T = 150(2)$  K, semiempirical absorption correction ( $0.541 \leq T \leq 0.696$ ), 7588 independent ( $R_{\text{int}} = 0.0269$ ) and 6917 observed ( $I \geq 2\sigma(I)$ ) intensities,  $P\bar{1}$ ,  $Z = 2$ ,  $R = 0.0298$ ,  $wR = 0.0628$ , refinement of 475 parameters against

$|F^2|$  with hydrogen atoms on calculated positions. The asymmetric unit contains a molecule of the complex and three molecules of water.

### References

- 1 E. P. Kyba, S.-T. Liu, R. L. Harris, *Organometallics* 1983, **2**, 1877–1879.
- 2 E. P. Kyba, M. C. Kerby, S. P. Rines, *Organometallics* 1986, **5**, 1189–1194.
- 3 C.-Y. Liu, D.-Y. Chen, G.-H. Lee, S.-M. Peng, S.-T. Liu, *Organometallics* 1996, **15**, 1055–1061.
